# Supplementary material
Source: Research Square preprint supplement (doi:10.21203/rs.3.rs-9469019/v1)
Supplement: Supplementary file 2 [file eb9331b02d806c23be56d38a.pdf]

### SP Performance Assessment Questionnaire (Trainee Version)

**Trainee Background:**  Resident (Year 1)  Resident (Year 2)  Resident (Year 3)  Fellow  Intern  Other \_\_\_\_\_

(Note: "Resident" refers to standardized residency training; "Fellow" refers to specialist/subspecialty training within the Chinese medical education system.)

**Trainee Gender:**  Male  Female

**Date of Evaluation:** \_\_\_\_\_

**Instructions:** Please evaluate the performance of the Standardized Patient (SP) based on your actual experience during the simulation interaction.

**Rating Scale:** 1 = Strongly Disagree, 2 = Disagree, 3 = Neutral, 4 = Agree, 5 = Strongly Agree

| Items                                                              | Specific Description                                                                                                      | Score |   |   |   |   |
|--------------------------------------------------------------------|---------------------------------------------------------------------------------------------------------------------------|-------|---|---|---|---|
|                                                                    |                                                                                                                           | 1     | 2 | 3 | 4 | 5 |
| 1.The SP's emotional expression was authentic and natural          | The SP authentically portrayed emotions such as grief, helplessness, and confusion following pregnancy loss.              | 1     | 2 | 3 | 4 | 5 |
| 2.The SP's emotional transitions were appropriate                  | The SP's emotional changes during the interaction were appropriate to the context and not abrupt.                         | 1     | 2 | 3 | 4 | 5 |
| 3.The SP maintained role consistency                               | The SP consistently maintained the assigned role without "breaking character" or deviating from the role.                 | 1     | 2 | 3 | 4 | 5 |
| 4.The SP's verbal expressions were close to those of real patients | The SP's language was natural, aligned with the expression habits of a typical patient, and avoided medical jargon.       | 1     | 2 | 3 | 4 | 5 |
| 5.The SP's nonverbal behaviors were appropriate                    | The SP's eye contact, body movements, and facial expressions were consistent with the emotional state, enhancing realism. | 1     | 2 | 3 | 4 | 5 |
| 6.Overall satisfaction with SP performance                         | I believe this SP's performance was highly consistent with the training objectives.                                       | 1     | 2 | 3 | 4 | 5 |

**Additional Comments (Optional):**

Do you have any other feedback or suggestions regarding the SP's performance in this training session?

\_\_\_\_\_

## SP Performance Assessment Questionnaire (Instructor Version)

Instructor: \_\_\_\_\_

Date of Evaluation: \_\_\_\_\_

**Instructions:** Please evaluate the performance of the Standardized Patient (SP) during the simulation session you observed, based on the interaction between the trainee and the SP.

**Rating Scale:** 1 = Strongly Disagree, 2 = Disagree, 3 = Neutral, 4 = Agree, 5 = Strongly Agree

| Items                                                              | Specific Description                                                                                                      | Score |   |   |   |   |
|--------------------------------------------------------------------|---------------------------------------------------------------------------------------------------------------------------|-------|---|---|---|---|
| 1.The SP's emotional expression was authentic and natural          | The SP authentically portrayed emotions such as grief, helplessness, and confusion following pregnancy loss.              | 1     | 2 | 3 | 4 | 5 |
| 2.The SP's emotional transitions were appropriate                  | The SP's emotional changes during the interaction were appropriate to the context and not abrupt.                         | 1     | 2 | 3 | 4 | 5 |
| 3.The SP maintained role consistency                               | The SP consistently maintained the assigned role without "breaking character" or deviating from the role.                 | 1     | 2 | 3 | 4 | 5 |
| 4.The SP's verbal expressions were close to those of real patients | The SP's language was natural, aligned with the expression habits of a typical patient, and avoided medical jargon.       | 1     | 2 | 3 | 4 | 5 |
| 5.The SP's nonverbal behaviors were appropriate                    | The SP's eye contact, body movements, and facial expressions were consistent with the emotional state, enhancing realism. | 1     | 2 | 3 | 4 | 5 |
| 6.Overall satisfaction with SP performance                         | I believe this SP's performance was highly consistent with the training objectives.                                       | 1     | 2 | 3 | 4 | 5 |

\_\_\_\_\_

**Additional Comments (Optional):**

Do you have any other feedback or suggestions regarding the SP's performance in this training session?

\_\_\_\_\_
